# Supplementary material for: Transposons are important contributors to gene expression variability under selection in rice populations
Source: Research Square preprint supplement (doi:10.21203/rs.3.rs-2197876/v2), 2023-05-15
Supplement: Supplementary file 1 [file 9d743e8a19374ffae1b4f1a8.xlsx]

## Sheet: Table S2
tip	TIP family	TIP superfamily	freq_indica	freq_japonica	freq_rufipogon	condition	gene	RAPDB-id	effect	type
TIP_71836	Os0486	DNAnona/MULE	0.968254	0	0	eqtl	OS12T0139500-01	Os12t0139500-01	down	indica-specific
TIP_32986	Os0188	DNAnona/Helitron	0.960317	0	0	eqtl	OS04T0659100-01	Os04t0659100-01	down	indica-specific
TIP_18342	Os3580	DNAnona/Helitron	0.96	0	0	eqtl	OS03T0104800-01	Os03t0104800-01	down	indica-specific
TIP_57419	Os0023	DNAnona/MULE	0.957627	0	0	eqtl	OS08T0528200-01	Os08t0528200-01	down	indica-specific
TIP_38550	Os0187	DNAnona/hAT	0.952381	0	0	eqtl	OS05T0487300-02	Os05t0487300-02	down	indica-specific
TIP_13413	Os0181	MITE/Stow	0.939655	0	0	eqtl	OS02T0467200-01	Os02t0467200-01	down	indica-specific
TIP_2107	Os1668	MITE/Stow	0.909091	0	0	eqtl	OS01T0256500-02	Os01t0256500-02	up	indica-specific
TIP_15165	Os0179	MITE/Stow	0.888889	0	0	eqtl	OS02T0589400-01	Os02t0589400-01	down	indica-specific
TIP_55215	Os0008	LTR/Copia	0.880952	0	0	eqtl	OS08T0364900-00	Os08t0364900-00	up	indica-specific
TIP_61803	Os3327	MITE/Stow	0.84127	0	0	eqtl	OS09T0517000-01	Os09t0517000-01	up	indica-specific
TIP_73519	Os0015	MITE/Tourist	0.84127	0	0	eqtl	OS12T0409000-01	Os12t0409000-01	up	indica-specific
TIP_48004	Os0115	DNAnona/MULE	0.827869	0	0	eqtl	OS07T0212200-01	Os07t0212200-01	up	indica-specific
TIP_38559	Os0098	DNAnona/MULE	0.761905	0	0	eqtl	OS05T0488000-01	Os05t0488000-01	down	indica-specific
TIP_25333	Os0222	DNAnona/MULE	0.753968	0	0	eqtl	OS03T0714400-01	Os03t0714400-01	up	indica-specific
TIP_66601	Os1895	LTR/Gypsy	0.753968	0	0	eqtl	OS10T0552700-01	Os10t0552700-01	down	indica-specific
TIP_2128	Os0624	DNAnona/MULE	0.744	0	0	eqtl	OS01T0258600-00	Os01t0258600-00	up	indica-specific
TIP_3390	Os1202	LINE/unknown	0.730159	0	0	eqtl	OS01T0352100-01	Os01t0352100-01	down	indica-specific
TIP_1781	Os0441	DNAnona/MULE	0.699187	0	0	eqtl	OS01T0235100-01	Os01t0235100-01	up	indica-specific
TIP_26970	Os0314	DNAnona/MULE	0.680328	0	0	eqtl	OS03T0839100-01	Os03t0839100-01	up	indica-specific
TIP_7675	Os3327	MITE/Stow	0.666667	0	0	eqtl	OS01T0795832-00	Os01t0795832-00	down	indica-specific
TIP_14745	Os3002	MITE/Tourist	0.663793	0	0	eqtl	OS02T0556100-01	Os02t0556100-01	up	indica-specific
TIP_18343	Os0039	LTR/Gypsy	0.650794	0	0	eqtl	OS03T0105401-00	Os03t0105401-00	down	indica-specific
TIP_72734	Os0020	LTR/Gypsy	0.650794	0	0	eqtl	OS12T0226400-00	Os12t0226400-00	down	indica-specific
TIP_5273	Os0098	DNAnona/MULE	0.642857	0	0	eqtl	OS01T0611300-01	Os01t0611300-01	down	indica-specific
TIP_63074	Os2193	DNAnona/Helitron	0.595238	0	0	eqtl	OS10T0159800-04	Os10t0159800-04	up	indica-specific
TIP_60938	Os2191	DNAnona/Helitron	0.531746	0	0	eqtl	OS09T0451400-01	Os09t0451400-01	down	indica-specific
TIP_16657	Os0030	LTR/Gypsy	0.52381	0	0	eqtl	OS02T0701600-01	Os02t0701600-01	up	indica-specific
TIP_4852	RST-Osativa-Cluster	SINE/unknown	0.5	0	0	eqtl	OS01T0581300-01	Os01t0581300-01	up	indica-specific
TIP_34342	Os0228	DNAauto/hAT	0.484127	0	0	eqtl	OS05T0173500-01	Os05t0173500-01	down	indica-specific
TIP_52066	Os0911	LTR/Gypsy	0.484127	0	0	eqtl	OS07T0663600-01	Os07t0663600-01	down	indica-specific
TIP_11565	Os0228	DNAauto/hAT	0.380952	0	0	eqtl	OS02T0222100-01	Os02t0222100-01	down	indica-specific
TIP_18780	Os0177	DNAauto/MULE	0.31746	0	0	eqtl	OS03T0138900-01	Os03t0138900-01	down	indica-specific
TIP_15753	Os1015	DNAnona/MULE	0.301587	0	0	eqtl	OS02T0635000-01	Os02t0635000-01	up	indica-specific
TIP_9707	Os0480	DNAnona/MULE	0.288	0	0	eqtl	OS01T0952700-01	Os01t0952700-01	up	indica-specific
TIP_4827	Os1015	DNAnona/MULE	0.277778	0	0	eqtl	OS01T0579900-01	Os01t0579900-01	down	indica-specific
TIP_30503	Os3638	LTR/Copia	0.274194	0	0	eqtl	OS04T0469000-01	Os04t0469000-01	up	indica-specific
TIP_38149	Os0385	DNAauto/MULE	0.261905	0	0	eqtl	OS05T0455400-01	Os05t0455400-01	down	indica-specific
TIP_62375	Os3339	DNAauto/MULE	0.261905	0	0	eqtl	OS09T0559600-01	Os09t0559600-01	down	indica-specific
TIP_42813	Os0385	DNAauto/MULE	0.246032	0	0	eqtl	OS06T0345200-02	Os06t0345200-02	up	indica-specific
TIP_30135	Os0236	LINE/unknown	0.238095	0	0	eqtl	OS04T0443900-01	Os04t0443900-01	down	indica-specific
TIP_165	Os0260	DNAnona/CACTA	0.190476	0	0	eqtl	OS01T0116900-00	Os01t0116900-00	down	indica-specific
TIP_70823	Os0385	DNAauto/MULE	0.176	0	0	eqtl	OS11T0595200-01	Os11t0595200-01	down	indica-specific
TIP_53785	Os0196	LTR/Gypsy	0.169355	0	0	eqtl	OS08T0203800-01	Os08t0203800-01	up	indica-specific
TIP_170	Os0227	DNAnona/hAT	0.166667	0	0	eqtl	OS01T0117600-01	Os01t0117600-01	up	indica-specific
TIP_27028	Os0038	LTR/TRIM	0.150794	0	0	eqtl	OS03T0845000-01	Os03t0845000-01	up	indica-specific
TIP_26835	Os0071	MITE/Tourist	0.142857	0	0	eqtl	OS03T0826000-01	Os03t0826000-01	up	indica-specific
TIP_41506	Os0015	MITE/Tourist	0.142857	0	0	eqtl	OS06T0232200-00	Os06t0232200-00	down	indica-specific
TIP_41510	Os0098	DNAnona/MULE	0.142857	0	0	eqtl	OS06T0232200-00	Os06t0232200-00	down	indica-specific
TIP_53604	Os0073	DNAnona/unknown	0.126984	0	0	eqtl	OS08T0183900-01	Os08t0183900-01	down	indica-specific
TIP_19871	Os0218	DNAnona/MULE	0.111111	0	0	eqtl	OS03T0219200-01	Os03t0219200-01	down	indica-specific
TIP_56350	Os0588	LINE/unknown	0.0714286	0	0	eqtl	OS08T0452900-01	Os08t0452900-01	down	indica-specific
TIP_60553	Os0652	LINE/unknown	0.0714286	0	0	eqtl	OS09T0428900-01	Os09t0428900-01	up	indica-specific
TIP_27545	Os3638	LTR/Copia	0.0683761	0	0	eqtl	OS04T0161100-00	Os04t0161100-00	down	indica-specific
TIP_49938	Os0385	DNAauto/MULE	0.0634921	0	0	eqtl	OS07T0490400-01	Os07t0490400-01	up	indica-specific
TIP_10251	Os0071	MITE/Tourist	0.0555556	0	0	eqtl	OS02T0125100-01	Os02t0125100-01	down	indica-specific
TIP_32461	Os2708	LTR/Copia	0.0555556	0	0	eqtl	OS04T0614000-01	Os04t0614000-01	up	indica-specific
TIP_57681	Os0003	MITE/Stow	0.0555556	0	0	eqtl	OS08T0545700-01	Os08t0545700-01	down	indica-specific
TIP_19567	Os0227	DNAnona/hAT	0.0396825	0	0	eqtl	OS03T0196600-01	Os03t0196600-01	down	indica-specific
TIP_23085	Os0156	LTR/Copia	0.031746	0	0	eqtl	OS03T0563300-01	Os03t0563300-01	down	indica-specific
TIP_60738	Os0049	MITE/Tourist	0.031746	0	0	eqtl	OS09T0438100-01	Os09t0438100-01	down	indica-specific
TIP_62415	Os0228	DNAauto/hAT	0.031746	0	0	eqtl	OS09T0565300-01	Os09t0565300-01	up	indica-specific
TIP_67033	Os0156	LTR/Copia	0.031746	0	0	eqtl	OS11T0107500-01	Os11t0107500-01	up	indica-specific
TIP_6916	Os0071	MITE/Tourist	0.031746	0	0	eqtl	OS01T0728900-01	Os01t0728900-01	up	indica-specific
TIP_75868	Os3472	LTR/Gypsy	0.031746	0	0	eqtl	OS12T0637300-01	Os12t0637300-01	up	indica-specific
TIP_37832	Os1302	DNAnona/MULE	0	0.963415	0	TIP_37832	OS05T0430900-01	Os05t0430900-01	down	japonica-specific
TIP_64408	Os2659	DNAnona/CACTG	0	0.963415	0	TIP_64408	OS10T0389300-01	Os10t0389300-01	down	japonica-specific
TIP_48427	Os0125	MITE/Tourist	0	0.962963	0	TIP_48427	OS07T0249800-01	Os07t0249800-01	down	japonica-specific
TIP_52097	Os2618	LTR/Copia	0	0.962963	0	TIP_52097	OS07T0664500-01	Os07t0664500-01	down	japonica-specific
TIP_12836	Os0004	MITE/Tourist	0	0.939024	0	TIP_12836	OS02T0320800-01	Os02t0320800-01	down	japonica-specific
TIP_41589	Os1538	DNAnona/MULE	0	0.883117	0	TIP_41589	OS06T0238300-01	Os06t0238300-01	up	japonica-specific
TIP_66991	Os0282	LTR/Copia	0	0.878049	0	TIP_66991	OS10T0580500-00	Os10t0580500-00	down	japonica-specific
TIP_34402	Os0360	DNAnona/MULE	0	0.853659	0	TIP_34402	OS05T0179100-01	Os05t0179100-01	down	japonica-specific
TIP_54046	Os0360	DNAnona/MULE	0	0.825	0	TIP_54046	OS08T0241300-01	Os08t0241300-01	down	japonica-specific
TIP_68080	Os0874	DNAnona/MULE	0	0.819444	0	TIP_68080	OS11T0208900-01	Os11t0208900-01	up	japonica-specific
TIP_9823	Os0248	LINE/unknown	0	0.814815	0	TIP_9823	OS01T0962400-01	Os01t0962400-01	down	japonica-specific
TIP_39118	Os1960	LTR/Copia	0	0.756098	0	TIP_39118	OS05T0527200-00	Os05t0527200-00	down	japonica-specific
TIP_65671	Os0744	LTR/Copia	0	0.5875	0	TIP_65671	OS10T0483900-01	Os10t0483900-01	down	japonica-specific
TIP_49046	Os0103	DNAnona/MULE	0	0.585366	0	TIP_49046	OS07T0409100-01	Os07t0409100-01	down	japonica-specific
TIP_65945	Os2616	MITE/Tourist	0	0.556962	0	TIP_65945	OS10T0505500-01	Os10t0505500-01	down	japonica-specific
TIP_65945	Os2616	MITE/Tourist	0	0.556962	0	TIP_65945	OS10T0505700-01	Os10t0505700-01	down	japonica-specific
TIP_695	Os0250	DNAnona/MULE	0	0.463415	0	TIP_695	OS01T0170600-02	Os01t0170600-02	down	japonica-specific
TIP_54643	Os0200	LTR/Gypsy	0	0.45122	0	TIP_54643	OS08T0301500-01	Os08t0301500-01	down	japonica-specific
TIP_66865	Os2689	DNAnona/hAT	0	0.45122	0	TIP_66865	OS10T0569800-00	Os10t0569800-00	down	japonica-specific
TIP_54903	Os0173	LTR/Gypsy	0	0.402439	0	TIP_54903	OS08T0335500-01	Os08t0335500-01	down	japonica-specific
TIP_29101	Os0908	DNAauto/Helitron	0	0.390244	0	TIP_29101	OS04T0373400-01	Os04t0373400-01	up	japonica-specific
TIP_6873	Os1020	DNAnona/hAT	0	0.317073	0	TIP_6873	OS01T0725000-01	Os01t0725000-01	down	japonica-specific
TIP_6883	Os0173	LTR/Gypsy	0	0.304878	0	TIP_6883	OS01T0726001-00	Os01t0726001-00	down	japonica-specific
TIP_44697	Os0030	LTR/Gypsy	0	0.256098	0	TIP_44697	OS06T0609500-01	Os06t0609500-01	down	japonica-specific
TIP_55405	Os0235	DNAauto/MULE	0	0.256098	0	TIP_55405	OS08T0385000-01	Os08t0385000-01	down	japonica-specific
TIP_73655	Os3047	DNAnona/Helitron	0	0.231707	0	TIP_73655	OS12T0425800-01	Os12t0425800-01	up	japonica-specific
TIP_33980	Os3520	DNAnona/hAT	0	0.21519	0	TIP_33980	OS05T0147100-01	Os05t0147100-01	down	japonica-specific
TIP_75288	Os2606	DNAnona/Helitron	0	0.209877	0	TIP_75288	OS12T0595000-01	Os12t0595000-01	up	japonica-specific
TIP_57577	Os0105	DNAnona/MULE	0	0.207317	0	TIP_57577	OS08T0538600-01	Os08t0538600-01	down	japonica-specific
TIP_62522	Os0179	MITE/Stow	0	0.207317	0	TIP_62522	OS10T0101100-01	Os10t0101100-01	down	japonica-specific
TIP_27094	Os0334	DNAnona/PILE	0	0.195122	0	TIP_27094	OS03T0850600-01	Os03t0850600-01	up	japonica-specific
TIP_62633	Os1875	LINE/unknown	0	0.185185	0	TIP_62633	OS10T0112700-01	Os10t0112700-01	up	japonica-specific
TIP_21734	Os0030	LTR/Gypsy	0	0.182927	0	TIP_21734	OS03T0355900-00	Os03t0355900-00	down	japonica-specific
TIP_58595	Os0030	LTR/Gypsy	0	0.158537	0	TIP_58595	OS09T0251800-01	Os09t0251800-01	down	japonica-specific
TIP_9851	Os2274	DNAauto/MULE	0	0.158537	0	TIP_9851	OS01T0965400-01	Os01t0965400-01	up	japonica-specific
TIP_57867	Os0026	MITE/Tourist	0	0.134146	0	TIP_57867	OS08T0559000-01	Os08t0559000-01	up	japonica-specific
TIP_9953	Os0076	LTR/Copia	0	0.134146	0	TIP_9953	OS01T0976700-01	Os01t0976700-01	down	japonica-specific
TIP_33915	Os0243	DNAnona/MULE	0	0.121951	0	TIP_33915	OS05T0134200-01	Os05t0134200-01	down	japonica-specific
TIP_71007	Os0385	DNAauto/MULE	0	0.121951	0	TIP_71007	OS11T0621400-01	Os11t0621400-01	up	japonica-specific
TIP_23764	Os1403	DNAnona/MULE	0	0.0853659	0	TIP_23764	OS03T0610900-01	Os03t0610900-01	up	japonica-specific
TIP_26728	Os0173	LTR/Gypsy	0	0.0609756	0	TIP_26728	OS03T0817200-01	Os03t0817200-01	up	japonica-specific
TIP_75819	Os0018	MITE/Tourist	0	0.0609756	0	TIP_75819	OS12T0632800-00	Os12t0632800-00	up	japonica-specific
TIP_22744	Os1628	DNAnona/PILE	0	0.0487805	0	TIP_22744	OS03T0424800-00	Os03t0424800-00	down	japonica-specific
TIP_40647	Os0188	DNAnona/Helitron	0	0.0487805	0	TIP_40647	OS06T0163200-01	Os06t0163200-01	down	japonica-specific
